# Supplementary material
Source: Springer Nature journal article supplement (https://www.springermedizin.de/resource/supplementary/12865_2008_237_MOESM6_ESM.pdf/9427578)

A

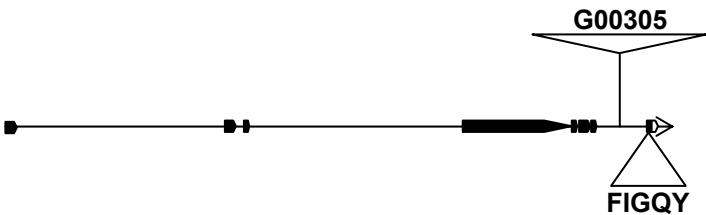

C

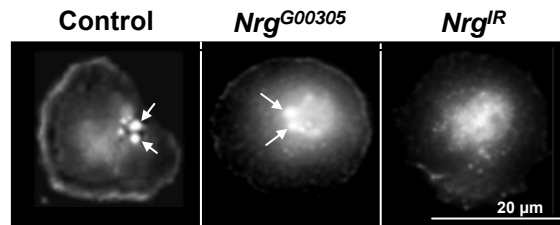

B

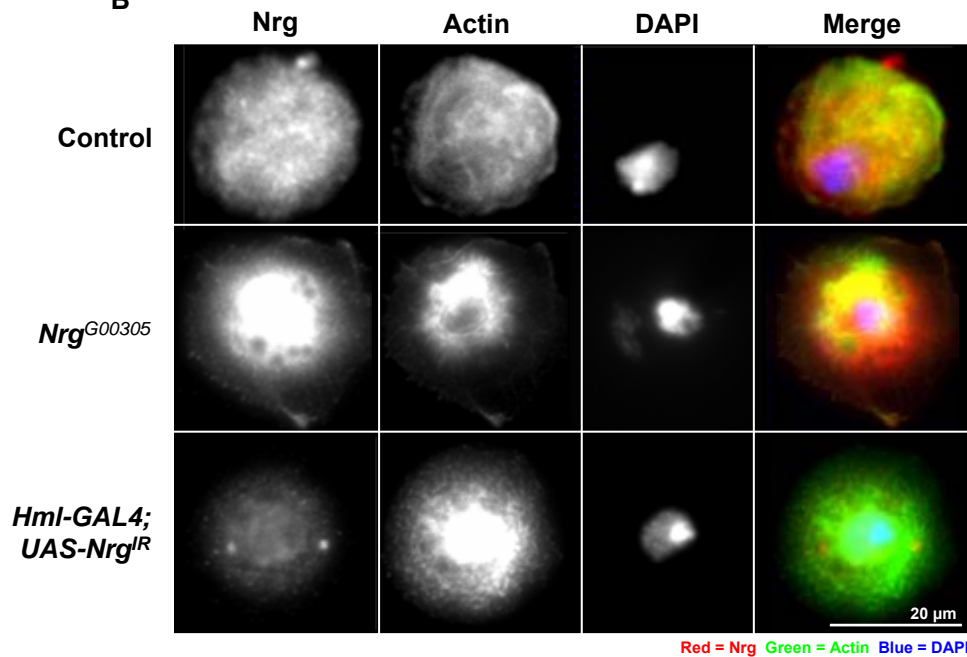

Supplement: MOESM6 [file 9427578]
